# Supplementary material for: Deep Learning Based Automated Orthotopic Lung Tumor Segmentation in Whole-Body Mouse CT-Scans
Source: MDPI journal article supplement (doi:10.3390/cancers13184585), 2021-09-13
Supplement: s1 [file Supplementary figures_resubmission.pdf › Supplementary figures_resubmission.pdf]

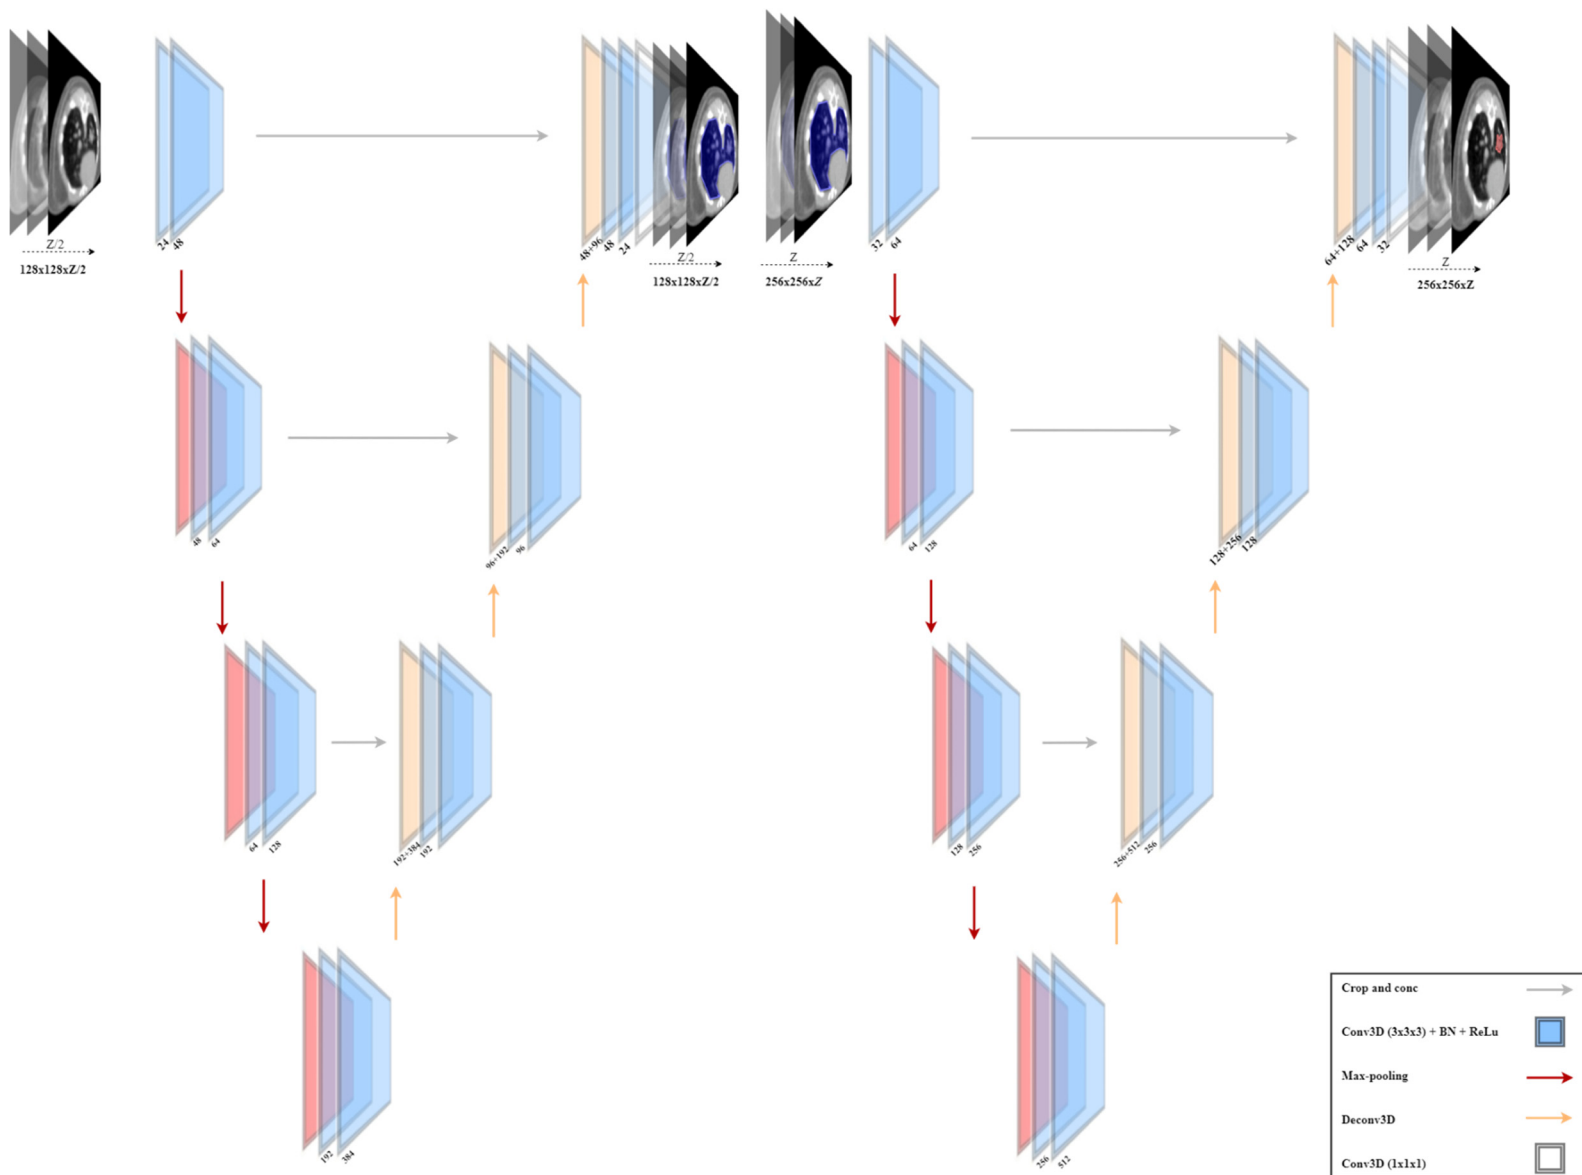

**Supplementary Figure 1.** The two-step 3D U-Net network architecture implemented in TensorFlow.

**A**

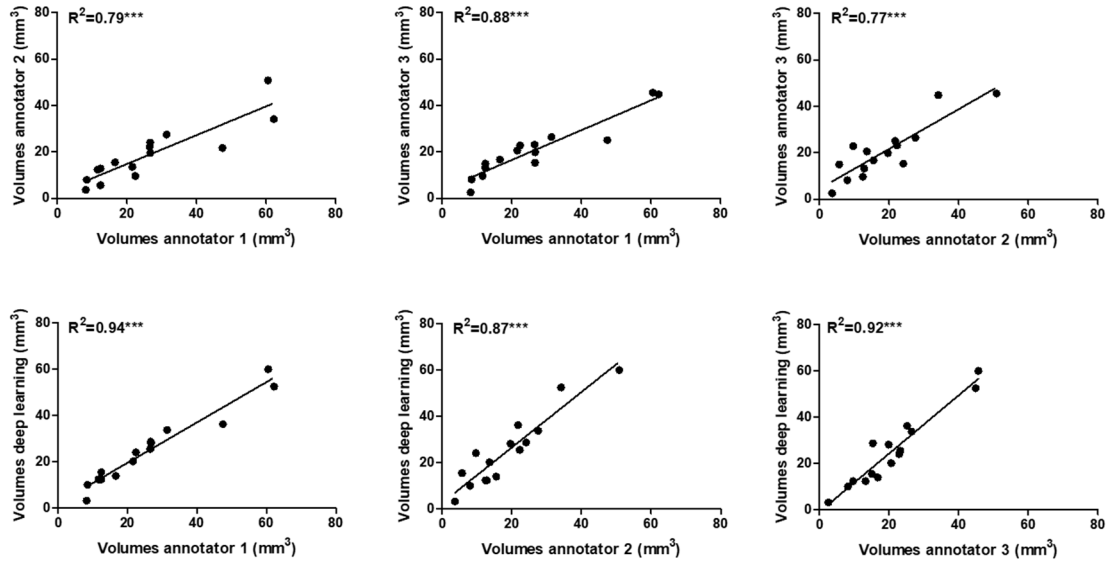

**B**

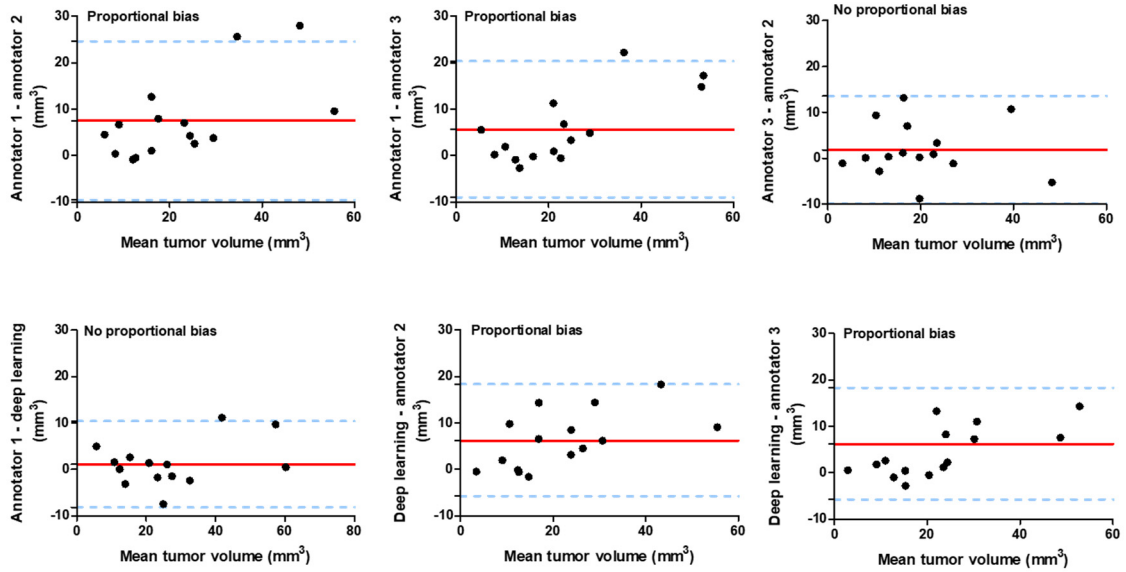

**C**

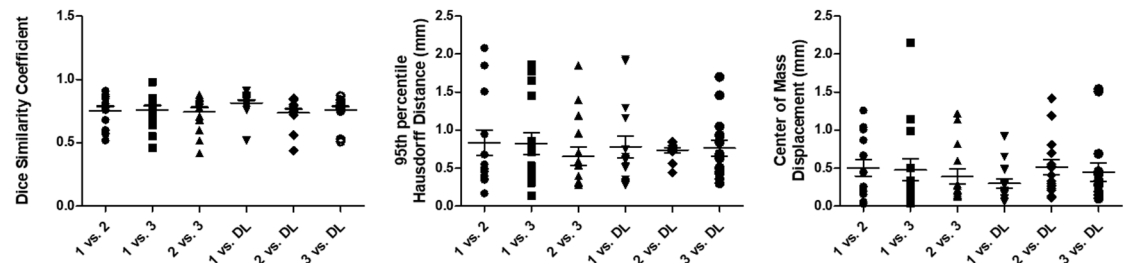

**Supplementary Figure 2. Subjectivity and bias in human interpretation. A,** Linear relationship between annotators and annotators-deep learning algorithm. \*\*\*  $P$ -value  $< 0.001$ . **B,** The Bland-Altman plot indicating agreement or disagreement between tumor volume segmentations. The dotted blue lines indicate the upper- and lower 95% confidence intervals. The red line indicates the mean. **C,** Aligned dot plot ( $n=15$ ) of the quantitative performance scores

*(dice similarity coefficients, 95th percentile Hausdorff Distance (in mm), and center of mass displacement (in mm)) calculated for each of the comparisons.*
